# Supplementary material for: Diagnosis by simplicity: an aptachip for dopamine capture and accurate detection with a dual colorimetric and fluorometric system
Source: Royal Society of Chemistry journal article supplement (doi:10.1039/c8tb00913a), 2018-01-01
Supplement: c8tb00913a1.pdf [file c8tb00913a1.pdf]

## Supporting Information

### **Diagnosis by simplicity: An aptachip for dopamine capture and accurate detection with a dual colorimetric and fluorometric system**

Tzu-Yang Lin<sup>1</sup>, Kuo-Chen Wei<sup>1</sup>, Shin-Pon Ju, Chiung-Yin Huang, Hung-Wei Yang\*

<sup>1</sup> T. Y. Lin and K. C. Wei contributed equally to this work

\* Address correspondence to H.-W. Yang

Tel: (+886) -7-5252000#5842; E-mail: [howardyang@mail.nsysu.edu.tw](mailto:howardyang@mail.nsysu.edu.tw)

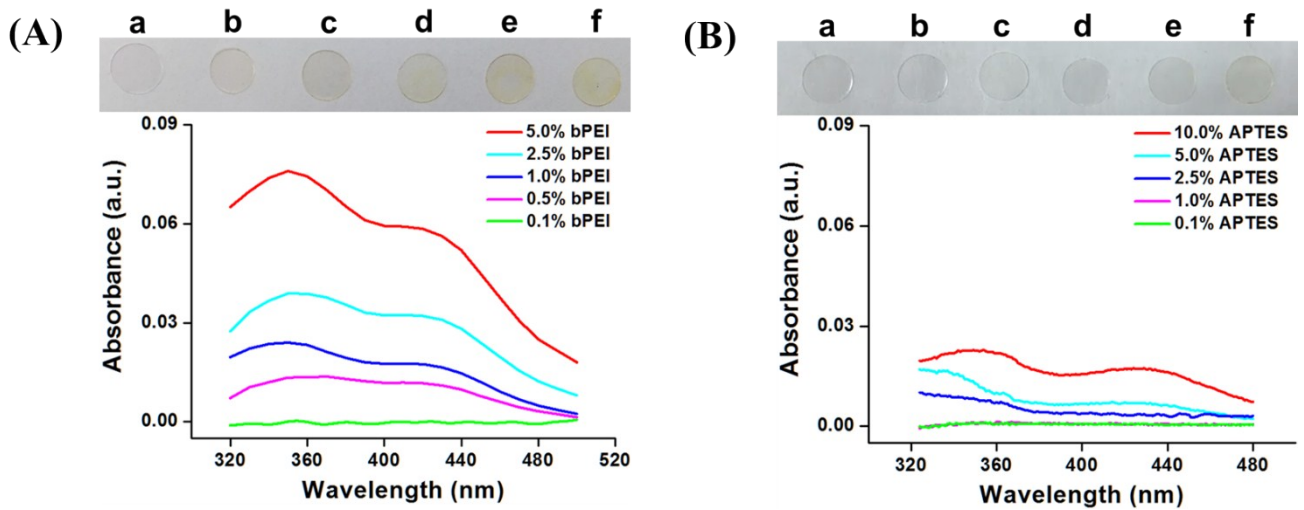

**Figure S1.** (A) Quantification of amine groups ( $-\text{NH}_2$ ) on  $\text{chip}_{\text{bPEI}}$  by TNBS staining modified with (a) 0% (negative control), (b) 0.1%, (c) 0.5%, (d) 1.0%, (e) 2.5% (f) 5.0% bPEI, respectively. (B) Quantification of amine groups ( $-\text{NH}_2$ ) on  $\text{Chip}_{\text{bPEI}}$  by TNBS staining modified with (a) 0% (negative control), (b) 0.1%, (c) 1.0%, (d) 2.5%, (e) 5.0% (f) 10.0% APTES, respectively.

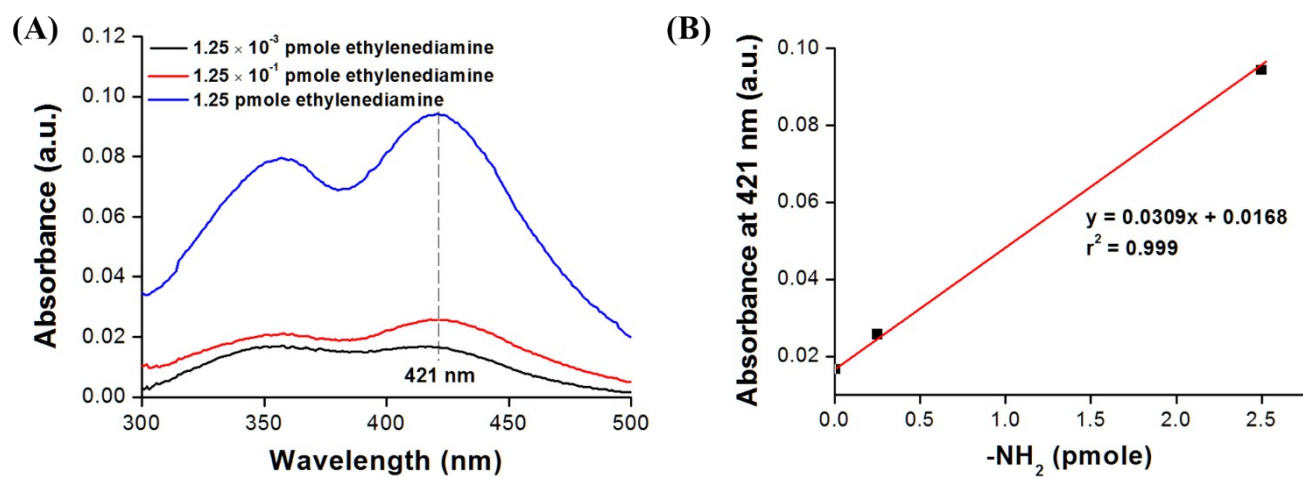

**Figure S2.** (A) The UV-Vis spectra of different concentrations of ethylenediamine reacted with TNBS.

(B) Derived calibration curve of the adsorption at 421 nm versus concentration of amine groups.

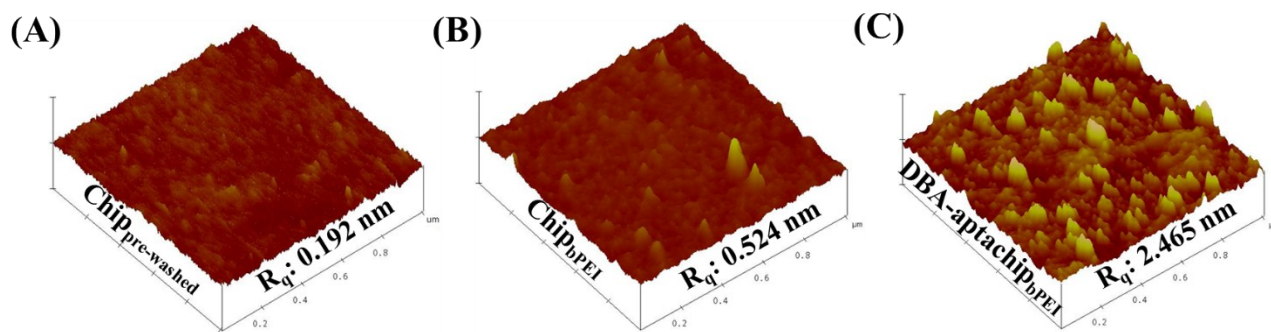

**Figure S3.** AFM images of (A)  $\text{Chip}_{\text{pre-washed}}$ , (B)  $\text{Chip}_{\text{bPEI}}$ , and (C)  $\text{DBA-aptachip}_{\text{bPEI}}$ .

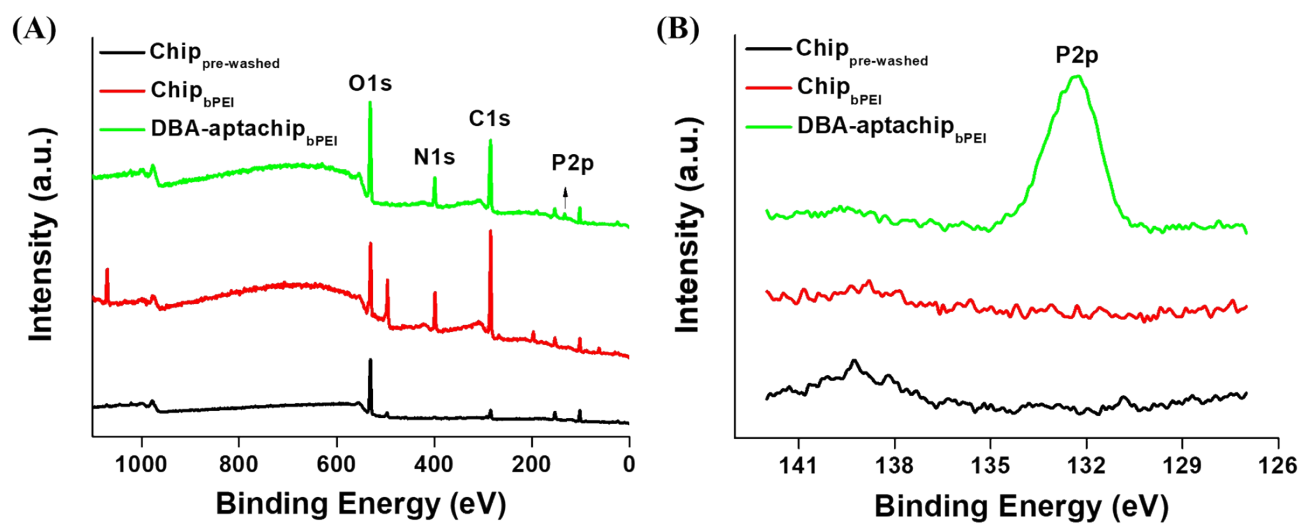

**Figure S4.** (A) XPS survey spectra of  $\text{chip}_{\text{pre-washed}}$ ,  $\text{chip}_{\text{bPEI}}$ , and  $\text{DBA-aptachip}_{\text{bPEI}}$ . (B) Detailed analysis of XPS survey spectra for P2p of  $\text{DBA-aptachip}_{\text{bPEI}}$ .

**w/o NaOH**

**w/ NaOH**

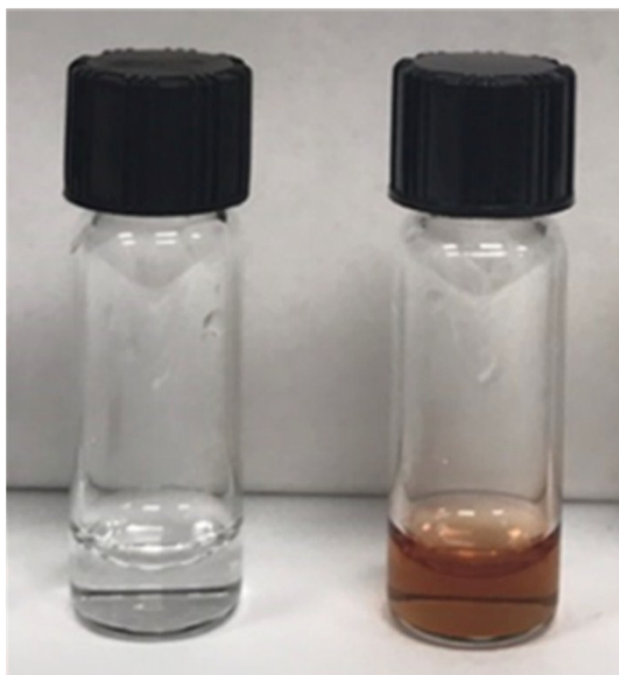

**Figure S5.** The picture of DA oxidization in the presence or absence of NaOH solution for colorimetric detection.

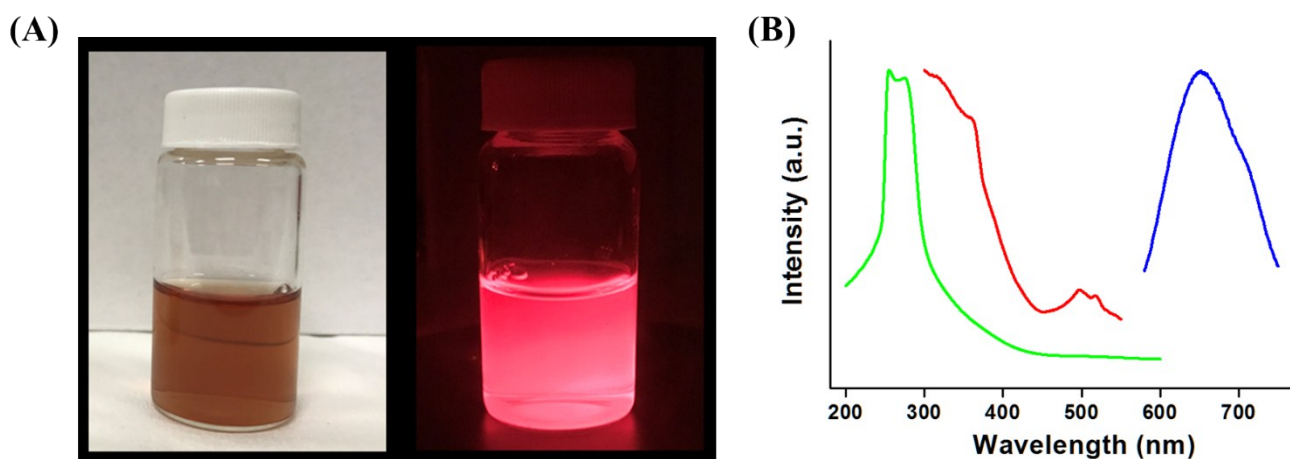

**Figure S6.** A) The left image shows BSA-AuNCs without excitation. The right images show BSA-AuNCs with excitation at 500 nm. (B) The image shows the absorbance spectra (green line), excitation spectra (red line) and emission spectra (blue line) of BSA-AuNCs. Peaks at 500 nm and 650 nm were employed as excitation and emission in this project.

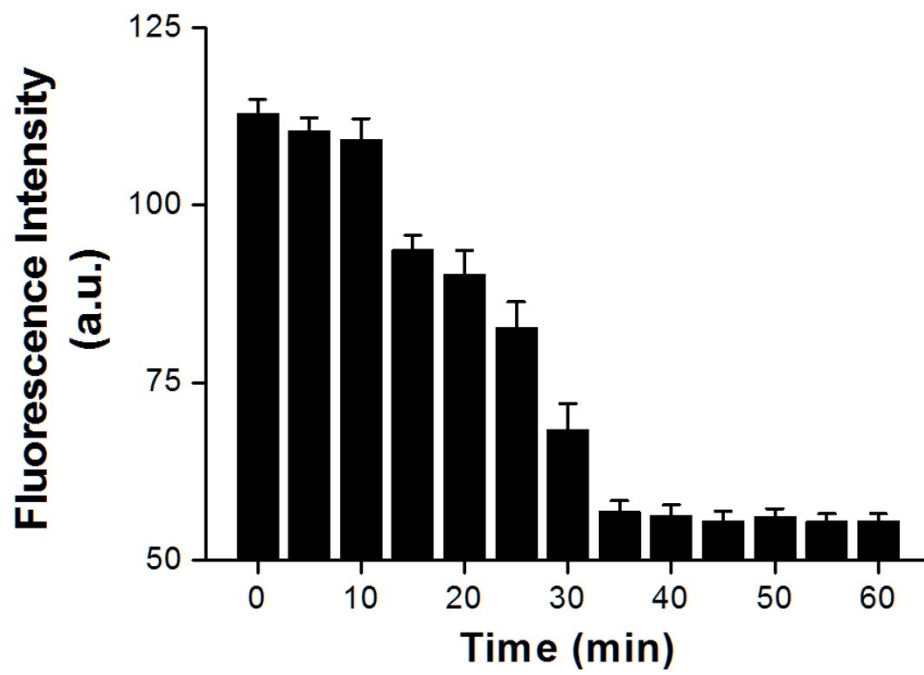

**Figure S7.** Quenching time of BSA-AuNCs interacting with 1 mg/mL DA on DBA-aptachip<sub>bPEI</sub>. Each data point is presented as mean  $\pm$  SD (n = 3).



**Table S1.** Comparison with some reported methods for the detection of dopamine.

| <b>Detection method</b> | <b>Linear detection range<br/>(<math>\mu\text{M}</math>)</b> | <b>Detection limitation<br/>(<math>\mu\text{M}</math>)</b> | <b>Reference</b> |
|-------------------------|--------------------------------------------------------------|------------------------------------------------------------|------------------|
| Colorimetric            | 0.2-1.1                                                      | 0.07                                                       | 14               |
| Colorimetric            | 0.54-5.4                                                     | 0.36                                                       | 25               |
| Colorimetric            | 0.2-12                                                       | 0.047                                                      | 4                |
| Photoluminescence       | 0.5-9                                                        | 0.1                                                        | 33               |
| Colorimetric            | 0.01-1                                                       | 0.01                                                       | 11               |
| Fluorescence            | 0.01-1                                                       | 0.01                                                       |                  |
| Colorimetric            | 0.65-65300                                                   | 0.065                                                      | This work        |
| Fluorescence            | 0.0065-65300                                                 | 0.0033                                                     |                  |
